# Supplementary material for: Using Horizontal to Vertical Spectral Ratios to construct shear-wave velocity profiles
Source: Copernicus journal article supplement (doi:10.5194/se-2020-86), 2020-06-09
Supplement: Supplementary file 1 [file supporting_information.doc]

Supporting Information for manuscript:

**Using Horizontal to Vertical Spectral Ratios to construct shear-wave velocity profiles**

Janneke van Ginkel1,2, Elmer Ruigrok2,3 and Rien Herber1

1 Energy and Sustainability Research Institute Groningen, University of Groningen

2 R&D Seismology and Acoustics, Royal Netherlands Meteorological Institute

3 Department of Earth Sciences, Utrecht University

Corresponding author: Janneke van Ginkel, j.a.van.ginkel@rug.nl

**Contents of this file**

Code for plotting shear-wave velocity profiles

**Additional Supporting information (files uploaded separately)**

Data set shear wave velocities “Velocities_NSG.csv”

**Introduction**

This supporting file provides the information on shear-wave velocities (file uploaded separately) for several depth intervals for the North Sea Group (NSG), determined at 63 locations across Groningen, the Netherlands. The following Matlab code plots the velocity profile for the North Sea Group for 63 stations in the Groningen network. The code reads the data file: Velocities_NSG.csv

The velocities are constructed as follows:

- Vs_50: average S-wave velocity between the surface and 50m depth seismometer.

- Vs_100: average S-wave velocity between the 50m and 100m depth seismometers.

- Vs_150: average S-wave velocity between the 100m and 150m depth seismometers.

- Vs_200: average S-wave velocity between the 150m and 200m depth seismometers.

These average S-wave velocities between the free surface and different depth levels at each borehole station were obtained with seismic interferometry. The procedure is based on Hofman et al., 2017, but recently expanded with more data and seismometers. Moreover, for estimating the interval velocities, seismic interferometry by cross-correlation has been replaced with seismic interferometry by deconvolution.

- Vs_NSG: average shear-wave velocities for the complete sedimentary sequence (North Sea Group) are obtained by picking the fundamental resonance frequency from H/V ratios of teleseismic arrivals and inverted to S-wave velocities (as described in Section 5 from the corresponding paper)

- Vs_NSL average shear-wave velocities for the lower section (200m depth up to base NSG) which: are obtained by harmonically d-averaging the velocities in the upper 200 meter from the the Vs_NSG .

- The depth of the NSG is accurately determined from 3D reflection seismics (van Dalfsen et al., 2006, Kruiver et al., 2017).

Although the Groningen network consist of 70 borehole stations, we were able to derive velocities for 63 sites. 7 sites are discarded due to sensor malfunctioning or the teleseism-based H/V ratios were not reliable due to the scattering effect of surrounding salt domes.

Table S1. Shear wave velocity values for several depth levels for the North Sea Group for 63 sites (data file with the table is uploaded separately).

Text S1.

Matlab code for plotting velocity profiles.

% Code that plots the velocity profiles up to base of the North Sea Group for each station of the

% Groningen Network

% By Janneke van Ginkel, October 2019 (j.a.van.ginkel@rug.nl,j.a.vanginkel@gmail.com)

stname='G25'; % station name as listed in the first column of the data file, e.g. 'G25'

% load the velocities from the data file

fname='Velocities_NSG.csv';

fid=fopen(fname,'r');

C=textscan(fid,'%s%f%f%f%f%f%f%f','delimiter',',', 'Headerlines',1);

stnames=C{1};

Vs_50=C{2};

Vs_100=C{3};

Vs_150=C{4};

Vs_200=C{5};

Vs_NSG=C{6};

Vs_NSL=C{7};

depth_NSG=C{8};

% vectorize the corresponding velocities and NSG depth to the stname

[tf,ix]=ismember(stname, stnames);

if tf==1

Vs50=Vs_50(ix);

Vs100=Vs_100(ix);

Vs150=Vs_150(ix);

Vs200=Vs_200(ix);

VsNSG=Vs_NSG(ix);

VsNSL=Vs_NSL(ix);

zNSG=depth_NSG(ix);

doplot=1;

else

disp(['No S-wave velocities available for station ',num2str(stname)]);

doplot=0;

end

z=[0;50;50;100;100;150;150;200;200;zNSG]; % depth vector

Vs=[Vs50;Vs50;Vs100;Vs100;Vs150;Vs150;Vs200;Vs200;VsNSL;VsNSL]; % shear wave velocity vector

% plotting

if doplot==1

figure('color','w')

plot(Vs,z,'LineWidth',3.0);

set(gca,'ydir','reverse');

set(gca,'FontSize',14);

xlabel('Velocity [m/s]')

ylabel('Depth [m]')

title(['S-wave velocity, ',stname])

xlim([0 800])

ylim([min(z) max(z)])

set(gca,'PlotBoxAspectRatio',[1 2 1])

set(gca,'LooseInset',get(gca,'TightInset'));

grid on

end
